# Supplementary material
Source: ML conference proceedings conference paper supplement (https://aclanthology.org/D18-1014)
Supplement: Attachment [file emnlp2018-recurrent-fusion-supp.pdf › emnlp2018-recurrent-fusion-supp/emnlp2018-recurrent-fusion-supp.pdf]

# Multimodal Language Analysis with Recurrent Multistage Fusion: Supplementary Material

Paul Pu Liang<sup>1</sup>, Ziyin Liu<sup>2</sup>, Amir Zadeh<sup>2</sup>, Louis-Philippe Morency<sup>2</sup>

<sup>1</sup>Machine Learning Department, <sup>2</sup>Language Technologies Institute

Carnegie Mellon University

{pliang, ziyinl, abagherz, morency}@cs.cmu.edu

## 1 Experiment Details

### 1.1 Multimodal Features

Here we present extra details on feature extraction for the language, visual and acoustic modalities.

**Language:** We used 300 dimensional Glove word embeddings trained on 840 billion tokens from the common crawl dataset (Pennington et al., 2014). These word embeddings were used to embed a sequence of individual words from video segment transcripts into a sequence of word vectors that represent spoken text.

**Visual:** The library Facet (iMotions, 2017) is used to extract a set of visual features including facial action units, facial landmarks, head pose, gaze tracking and HOG features (Zhu et al., 2006). These visual features are extracted from the full video segment at 30Hz to form a sequence of facial gesture measures throughout time.

**Acoustic:** The software COVAREP (Degottex et al., 2014) is used to extract acoustic features including 12 Mel-frequency cepstral coefficients, pitch tracking and voiced/unvoiced segmenting features (Drugman and Alwan, 2011), glottal source parameters (Childers and Lee, 1991; Drugman et al., 2012; Alku, 1992; Alku et al., 1997, 2002), peak slope parameters and maxima dispersion quotients (Kane and Gobl, 2013). These visual features are extracted from the full audio clip of each segment at 100Hz to form a sequence that represent variations in tone of voice over an audio segment.

### 1.2 Multimodal Alignment

We perform forced alignment using P2FA (Yuan and Liberman, 2008) to obtain the exact utterance time-stamp of each word. This allows us to align the three modalities together. Since words are considered the basic units of language we use the interval duration of each word utterance as one time-step. We acquire the aligned video and au-

dio features by computing the expectation of their modality feature values over the word utterance time interval (Zadeh et al., 2018).

## 2 Additional Results

Here we record the complete set of results for all the baseline models across all the datasets, tasks and metrics. Table 1 summarizes the complete results for sentiment analysis on the CMU-MOSI dataset. Table 2 presents the complete results for emotion recognition on the IEMOCAP dataset and Table 3 presents the complete results for personality traits prediction on the POM dataset. For experiments on the POM dataset we report additional results on MAE and correlation metrics for personality traits regression. We achieve significant improvement over state-of-the-art multi-view and dataset specific approaches across all these datasets, highlighting the RMFN’s capability in analyzing sentiment, emotions and speaker traits from human multimodal language.

| Dataset         | CMU-MOSI       |                |                |                    |                  |
|-----------------|----------------|----------------|----------------|--------------------|------------------|
| Task            | Sentiment      |                |                |                    |                  |
| Metric          | A <sup>2</sup> | F1             | A <sup>7</sup> | MAE                | Corr             |
| Majority        | 50.2           | 50.1           | 17.5           | 1.864              | 0.057            |
| RF              | 56.4           | 56.3           | 21.3           | -                  | -                |
| SVM-MD          | 71.6           | 72.3           | 26.5           | 1.100              | 0.559            |
| THMM            | 50.7           | 45.4           | 17.8           | -                  | -                |
| SAL-CNN         | 73.0           | -              | -              | -                  | -                |
| C-MKL           | 72.3           | 72.0           | 30.2           | -                  | -                |
| EF-HCRF         | 65.3           | 65.4           | 24.6           | -                  | -                |
| EF-LDHCRF       | 64.0           | 64.0           | 24.6           | -                  | -                |
| MV-HCRF         | 44.8           | 27.7           | 22.6           | -                  | -                |
| MV-LDHCRF       | 64.0           | 64.0           | 24.6           | -                  | -                |
| CMV-HCRF        | 44.8           | 27.7           | 22.3           | -                  | -                |
| CMV-LDHCRF      | 63.6           | 63.6           | 24.6           | -                  | -                |
| EF-HSSHCRF      | 63.3           | 63.4           | 24.6           | -                  | -                |
| MV-HSSHCRF      | 65.6           | 65.7           | 24.6           | -                  | -                |
| DF              | 72.3           | 72.1           | 26.8           | 1.143              | 0.518            |
| EF-LSTM         | 74.3           | 74.3           | 32.4           | 1.023              | 0.622            |
| EF-SLSTM        | 72.7           | 72.8           | 29.3           | 1.081              | 0.600            |
| EF-BLSTM        | 72.0           | 72.0           | 28.9           | 1.080              | 0.577            |
| EF-SBLSTM       | 73.3           | 73.2           | 26.8           | 1.037              | 0.619            |
| MV-LSTM         | 73.9           | 74.0           | 33.2           | 1.019              | 0.601            |
| BC-LSTM         | 73.9           | 73.9           | 28.7           | 1.079              | 0.581            |
| TFN             | 74.6           | 74.5           | 28.7           | 1.040              | 0.587            |
| GME-LSTM(A)     | 76.5           | 73.4           | -              | 0.955              | -                |
| MARN            | 77.1           | 77.0           | 34.7           | 0.968              | 0.625            |
| MFN             | 77.4           | 77.3           | 34.1           | 0.965              | 0.632            |
| RMFN            | <b>78.4</b>    | <b>78.0</b>    | <b>38.3</b>    | <b>0.922</b>       | <b>0.681</b>     |
| $\Delta_{SOTA}$ | $\uparrow 1.0$ | $\uparrow 0.7$ | $\uparrow 3.6$ | $\downarrow 0.033$ | $\uparrow 0.049$ |
| Human           | 85.7           | 87.5           | 53.9           | 0.710              | 0.820            |

Table 1: Sentiment prediction results on CMU-MOSI test set. The best results are highlighted in bold and  $\Delta_{SOTA}$  shows the change in performance over previous state of the art (SOTA). Improvements are highlighted in green. The RMFN significantly outperforms the current SOTA across all evaluation metrics.

| Dataset         | IEMOCAP Emotions |                |                |                |                  |                |                  |                  |
|-----------------|------------------|----------------|----------------|----------------|------------------|----------------|------------------|------------------|
| Task            | Happy            |                | Sad            |                | Angry            |                | Neutral          |                  |
| Metric          | A <sup>2</sup>   | F1             | A <sup>2</sup> | F1             | A <sup>2</sup>   | F1             | A <sup>2</sup>   | F1               |
| Majority        | 85.6             | 79.0           | 79.4           | 70.3           | 75.8             | 65.4           | 59.1             | 44.0             |
| SVM             | 86.1             | 81.5           | 81.1           | 78.8           | 82.5             | 82.4           | 65.2             | 64.9             |
| RF              | 85.5             | 80.7           | 80.1           | 76.5           | 81.9             | 82.0           | 63.2             | 57.3             |
| THMM            | 85.6             | 79.2           | 79.5           | 79.8           | 79.3             | 73.0           | 58.6             | 46.4             |
| EF-HCRF         | 85.7             | 79.2           | 79.4           | 70.3           | 75.8             | 65.4           | 59.1             | 44.0             |
| EF-LDHCRF       | 85.8             | 79.5           | 79.4           | 70.3           | 75.8             | 65.4           | 59.1             | 44.0             |
| MV-HCRF         | 15.0             | 4.9            | 79.4           | 70.3           | 24.2             | 9.4            | 59.1             | 44.0             |
| MV-LDHCRF       | 85.7             | 79.2           | 79.4           | 70.3           | 75.8             | 65.4           | 59.1             | 44.0             |
| CMV-HCRF        | 14.4             | 3.6            | 79.4           | 70.3           | 24.2             | 9.4            | 59.1             | 44.0             |
| CMV-LDHCRF      | 85.8             | 79.5           | 79.4           | 70.3           | 75.8             | 65.4           | 59.1             | 44.0             |
| EF-HSSHCRF      | 85.8             | 79.5           | 79.4           | 70.3           | 75.8             | 65.4           | 59.1             | 44.0             |
| MV-HSSHCRF      | 85.8             | 79.5           | 79.4           | 70.3           | 75.8             | 65.4           | 59.1             | 44.0             |
| DF              | 86.0             | 81.0           | 81.8           | 81.2           | 75.8             | 65.4           | 59.1             | 44.0             |
| EF-LSTM         | 85.2             | 83.3           | 82.1           | 81.1           | 84.5             | 84.3           | 68.2             | 67.1             |
| EF-SLSTM        | 85.6             | 79.0           | 80.7           | 80.2           | 82.8             | 82.2           | 68.8             | 68.5             |
| EF-BLSTM        | 85.0             | 83.7           | 81.8           | 81.6           | 84.2             | 83.3           | 67.1             | 66.6             |
| EF-SBLSTM       | 86.0             | 84.2           | 80.2           | 80.5           | <b>85.2</b>      | 84.5           | 67.8             | 67.1             |
| MV-LSTM         | 85.9             | 81.3           | 80.4           | 74.0           | 85.1             | 84.3           | 67.0             | 66.7             |
| BC-LSTM         | 84.9             | 81.7           | 83.2           | 81.7           | 83.5             | 84.2           | 67.5             | 64.1             |
| TFN             | 84.8             | 83.6           | 83.4           | 82.8           | 83.4             | 84.2           | 67.5             | 65.4             |
| MARN            | 86.7             | 83.6           | 82.0           | 81.2           | 84.6             | 84.2           | 66.8             | 65.9             |
| MFN             | 86.5             | 84.0           | 83.5           | 82.1           | 85.0             | 83.7           | <b>69.6</b>      | <b>69.2</b>      |
| RMFN            | <b>87.5</b>      | <b>85.8</b>    | <b>83.8</b>    | <b>82.9</b>    | 85.1             | <b>84.6</b>    | 69.5             | 69.1             |
| $\Delta_{SOTA}$ | $\uparrow 0.8$   | $\uparrow 1.6$ | $\uparrow 0.3$ | $\uparrow 0.1$ | $\downarrow 0.1$ | $\uparrow 0.1$ | $\downarrow 0.1$ | $\downarrow 0.1$ |

Table 2: Emotion recognition results on IEMOCAP test set. The best results are highlighted in bold and  $\Delta_{SOTA}$  shows the change in performance over previous SOTA. Improvements are highlighted in green. The RMFN achieves state-of-the-art or competitive performance across all evaluation metrics.

| Dataset         | POM Speaker Personality Traits |                |                |                |                |                |                |                |                |                |                |                |
|-----------------|--------------------------------|----------------|----------------|----------------|----------------|----------------|----------------|----------------|----------------|----------------|----------------|----------------|
| Task            | Con                            | Pas            | Voi            | Cre            | Viv            | Exp            | Res            | Rel            | Tho            | Ner            | Per            | Hum            |
| Metric          | A <sup>7</sup>                 | A <sup>7</sup> | A <sup>7</sup> | A <sup>7</sup> | A <sup>7</sup> | A <sup>7</sup> | A <sup>5</sup> | A <sup>5</sup> | A <sup>5</sup> | A <sup>5</sup> | A <sup>7</sup> | A <sup>5</sup> |
| Majority        | 19.2                           | 20.2           | 30.5           | 21.7           | 25.6           | 26.1           | 29.6           | 39.4           | 31.0           | 24.1           | 20.7           | 6.9            |
| SVM             | 20.6                           | 20.7           | 32.0           | 25.1           | 29.1           | 26.6           | 34.0           | 49.8           | 39.9           | 41.4           | 28.1           | 36.0           |
| RF              | 26.6                           | 27.1           | 29.6           | 23.2           | 23.6           | 26.6           | 34.0           | 40.9           | 37.4           | 36.0           | 25.6           | 40.4           |
| THMM            | 24.1                           | 15.3           | 19.2           | 27.6           | 26.1           | 18.7           | 22.7           | 31.5           | 30.0           | 27.1           | 17.2           | 24.6           |
| DF              | 25.6                           | 24.1           | 33.0           | 26.1           | 32.0           | 26.6           | 30.0           | 50.2           | 37.9           | 42.4           | 26.6           | 34.5           |
| EF-LSTM         | 20.7                           | 27.6           | 31.5           | 25.1           | 31.0           | 25.1           | 30.0           | 48.3           | 42.4           | 40.4           | 25.6           | 36.0           |
| EF-SLSTM        | 22.2                           | 28.6           | 30.5           | 27.1           | 32.0           | 27.6           | 32.5           | 46.8           | 39.9           | 41.9           | 22.7           | 35.0           |
| EF-BLSTM        | 25.1                           | 26.1           | 34.0           | 29.6           | 31.0           | 25.6           | 30.0           | 46.3           | 41.9           | 42.9           | 25.6           | 39.4           |
| EF-SBLSTM       | 23.2                           | 30.5           | 29.1           | 27.6           | 32.5           | 31.0           | 33.5           | 47.8           | 39.4           | 44.8           | 25.6           | 38.9           |
| MV-LSTM         | 25.6                           | 28.6           | 28.1           | 25.6           | 32.5           | 29.6           | 33.0           | 50.7           | 37.9           | 42.4           | 26.1           | 38.9           |
| BC-LSTM         | 26.6                           | 26.6           | 31.0           | 27.6           | 36.5           | 30.5           | 33.0           | 47.3           | 45.8           | 36.0           | 27.1           | 36.5           |
| TFN             | 24.1                           | 31.0           | 31.5           | 24.6           | 25.6           | 27.6           | 30.5           | 35.5           | 33.0           | 42.4           | 27.6           | 33.0           |
| MARN            | 29.1                           | 34.0           | 34.5           | 31.5           | 35.0           | 31.5           | 36.9           | 52.2           | 46.8           | 47.3           | 31.0           | 44.8           |
| MFN             | 34.5                           | 35.5           | 37.4           | 34.5           | 36.9           | 36.0           | 38.4           | 53.2           | 47.3           | 47.8           | 34.0           | <b>47.3</b>    |
| RMFN            | <b>37.4</b>                    | <b>38.4</b>    | <b>37.4</b>    | <b>37.4</b>    | <b>38.9</b>    | <b>38.9</b>    | <b>39.4</b>    | <b>53.7</b>    | <b>48.3</b>    | <b>48.3</b>    | <b>35.0</b>    | 46.8           |
| $\Delta_{SOTA}$ | $\uparrow 2.9$                 | $\uparrow 2.9$ | $\uparrow 0.0$ | $\uparrow 2.9$ | $\uparrow 2.0$ | $\uparrow 2.9$ | $\uparrow 1.0$ | $\uparrow 0.5$ | $\uparrow 1.0$ | $\uparrow 0.5$ | $\uparrow 1.0$ | $\uparrow 0.5$ |

| Dataset         | POM Speaker Personality Traits |                    |                    |                    |                    |                    |                    |                  |                  |                    |                  |                    |
|-----------------|--------------------------------|--------------------|--------------------|--------------------|--------------------|--------------------|--------------------|------------------|------------------|--------------------|------------------|--------------------|
| Task            | Con                            | Pas                | Voi                | Cre                | Viv                | Exp                | Res                | Rel              | Tho              | Ner                | Per              | Hum                |
| Metric          | MAE                            |                    |                    |                    |                    |                    |                    |                  |                  |                    |                  |                    |
| Majority        | 1.483                          | 1.268              | 1.089              | 1.260              | 1.158              | 1.164              | 1.166              | 0.753            | 0.939            | 1.181              | 1.328            | 1.774              |
| SVM             | 1.071                          | 1.159              | 0.938              | 1.036              | 1.043              | 1.031              | 0.877              | 0.594            | 0.728            | 0.714              | 1.110            | 0.801              |
| DF              | 1.033                          | 1.083              | 0.899              | 1.039              | 0.997              | 1.027              | 0.884              | 0.591            | 0.732            | 0.695              | 1.086            | 0.768              |
| EF-LSTM         | 1.035                          | 1.067              | 0.911              | 1.022              | 0.981              | 0.990              | 0.880              | 0.594            | 0.712            | 0.706              | 1.084            | 0.768              |
| EF-SLSTM        | 1.047                          | 1.069              | 0.924              | 1.040              | 0.990              | 1.005              | 0.872              | 0.597            | 0.726            | 0.686              | 1.098            | 0.787              |
| EF-BLSTM        | 1.103                          | 1.105              | 0.975              | 1.053              | 1.018              | 1.069              | 0.882              | 0.607            | 0.762            | 0.705              | 1.085            | 0.762              |
| EF-SBLSTM       | 1.062                          | 1.055              | 0.926              | 1.027              | 1.020              | 0.991              | 0.877              | 0.594            | 0.746            | 0.697              | 1.102            | 0.779              |
| MV-LSTM         | 1.029                          | 1.098              | 0.971              | 1.082              | 0.976              | 1.012              | 0.877              | 0.625            | 0.792            | 0.687              | 1.163            | 0.770              |
| BC-LSTM         | 1.016                          | 1.008              | 0.914              | 0.942              | <b>0.905</b>       | 0.906              | 0.888              | 0.630            | 0.680            | 0.705              | 1.025            | 0.767              |
| TFN             | 1.049                          | 1.104              | 0.927              | 1.058              | 1.000              | 1.029              | 0.900              | 0.621            | 0.743            | 0.727              | 1.132            | 0.770              |
| MARN            | 0.993                          | 1.033              | 0.886              | 0.945              | 0.950              | 0.945              | 0.860              | 0.576            | 0.685            | 0.677              | 1.036            | 0.749              |
| MFN             | 0.952                          | 0.993              | 0.882              | <b>0.903</b>       | 0.908              | <b>0.886</b>       | 0.821              | 0.566            | <b>0.665</b>     | 0.654              | <b>0.981</b>     | <b>0.727</b>       |
| RMFN            | <b>0.933</b>                   | <b>0.938</b>       | <b>0.868</b>       | 0.967              | 0.914              | 0.887              | <b>0.781</b>       | <b>0.566</b>     | 0.666            | <b>0.640</b>       | 1.014            | 0.728              |
| $\Delta_{SOTA}$ | $\downarrow 0.019$             | $\downarrow 0.055$ | $\downarrow 0.014$ | $\downarrow 0.064$ | $\downarrow 0.001$ | $\downarrow 0.020$ | $\downarrow 0.040$ | $\downarrow 0.0$ | $\uparrow 0.001$ | $\downarrow 0.014$ | $\uparrow 0.033$ | $\downarrow 0.001$ |

| Dataset         | POM Speaker Personality Traits |                  |                  |                    |                    |                    |                  |                  |                    |                  |                    |                    |
|-----------------|--------------------------------|------------------|------------------|--------------------|--------------------|--------------------|------------------|------------------|--------------------|------------------|--------------------|--------------------|
| Task            | Con                            | Pas              | Voi              | Cre                | Viv                | Exp                | Res              | Rel              | Tho                | Ner              | Per                | Hum                |
| Metric          | $r$                            |                  |                  |                    |                    |                    |                  |                  |                    |                  |                    |                    |
| Majority        | -0.041                         | -0.029           | -0.104           | -0.122             | -0.044             | -0.065             | 0.006            | -0.024           | -0.130             | 0.097            | -0.127             | -0.069             |
| SVM             | 0.063                          | 0.086            | -0.004           | 0.113              | 0.076              | 0.134              | 0.166            | 0.104            | 0.134              | 0.068            | 0.064              | 0.147              |
| DF              | 0.240                          | 0.273            | 0.017            | 0.112              | 0.173              | 0.118              | 0.148            | 0.019            | 0.041              | 0.136            | 0.168              | 0.259              |
| EF-LSTM         | 0.200                          | 0.302            | 0.031            | 0.170              | 0.244              | 0.265              | 0.142            | 0.083            | 0.260              | 0.105            | 0.217              | 0.227              |
| EF-SLSTM        | 0.221                          | 0.327            | 0.042            | 0.177              | 0.239              | 0.268              | 0.204            | 0.092            | 0.252              | 0.159            | 0.218              | 0.196              |
| EF-BLSTM        | 0.162                          | 0.289            | 0.034            | 0.191              | 0.279              | 0.274              | 0.184            | 0.093            | 0.245              | 0.166            | 0.243              | 0.272              |
| EF-SBLSTM       | 0.174                          | 0.310            | 0.021            | 0.170              | 0.224              | 0.261              | 0.155            | 0.097            | 0.215              | 0.121            | 0.216              | 0.171              |
| MV-LSTM         | 0.358                          | 0.416            | 0.131            | 0.280              | 0.347              | 0.323              | 0.295            | 0.119            | 0.284              | 0.258            | 0.239              | 0.317              |
| BC-LSTM         | 0.359                          | 0.425            | 0.081            | 0.358              | 0.417              | 0.450              | 0.293            | 0.075            | 0.363              | 0.184            | 0.344              | 0.319              |
| TFN             | 0.089                          | 0.201            | 0.030            | 0.124              | 0.204              | 0.171              | -0.051           | 0.114            | 0.048              | -0.002           | 0.106              | 0.213              |
| MARN            | 0.340                          | 0.410            | 0.166            | 0.340              | 0.374              | 0.406              | 0.282            | 0.215            | 0.348              | 0.235            | 0.303              | 0.287              |
| MFN             | 0.395                          | 0.428            | 0.193            | <b>0.367</b>       | <b>0.431</b>       | 0.452              | 0.333            | 0.255            | <b>0.381</b>       | 0.318            | <b>0.377</b>       | <b>0.386</b>       |
| RMFN            | <b>0.441</b>                   | <b>0.502</b>     | <b>0.247</b>     | 0.355              | 0.414              | <b>0.470</b>       | <b>0.446</b>     | <b>0.291</b>     | 0.376              | <b>0.379</b>     | 0.327              | 0.346              |
| $\Delta_{SOTA}$ | $\uparrow 0.046$               | $\uparrow 0.074$ | $\uparrow 0.054$ | $\downarrow 0.012$ | $\downarrow 0.017$ | $\downarrow 0.018$ | $\uparrow 0.113$ | $\uparrow 0.036$ | $\downarrow 0.005$ | $\uparrow 0.061$ | $\downarrow 0.050$ | $\downarrow 0.040$ |

Table 3: Results for personality trait recognition on the POM dataset. The best results are highlighted in bold and  $\Delta_{SOTA}$  shows the change in performance over previous state of the art. Improvements are highlighted in green. The RMFN achieves state-of-the-art or competitive performance across all evaluation metrics.

## References

- Paavo Alku. 1992. Glottal wave analysis with pitch synchronous iterative adaptive inverse filtering. *Speech communication* 11(2-3):109–118.
- Paavo Alku, Tom Bäckström, and Erkki Vilkmán. 2002. Normalized amplitude quotient for parametrization of the glottal flow. *the Journal of the Acoustical Society of America* 112(2):701–710.
- Paavo Alku, Helmer Strik, and Erkki Vilkmán. 1997. Parabolic spectral parameter a new method for quantification of the glottal flow. *Speech Communication* 22(1):67–79.
- Donald G Childers and CK Lee. 1991. Vocal quality factors: Analysis, synthesis, and perception. *the Journal of the Acoustical Society of America* 90(5):2394–2410.
- Gilles Degottex, John Kane, Thomas Drugman, Tuomo Raitio, and Stefan Scherer. 2014. Covarepa collaborative voice analysis repository for speech technologies. In *Acoustics, Speech and Signal Processing (ICASSP), 2014 IEEE International Conference on*. IEEE, pages 960–964.
- Thomas Drugman and Abeer Alwan. 2011. Joint robust voicing detection and pitch estimation based on residual harmonics. In *Interspeech*. pages 1973–1976.
- Thomas Drugman, Mark Thomas, Jon Gudnason, Patrick Naylor, and Thierry Dutoit. 2012. Detection of glottal closure instants from speech signals: A quantitative review. *IEEE Transactions on Audio, Speech, and Language Processing* 20(3):994–1006.
- iMotions. 2017. [Facial expression analysis. goo.gl/1rh1JN](https://goo.gl/1rh1JN).
- John Kane and Christer Gobl. 2013. Wavelet maxima dispersion for breathy to tense voice discrimination. *IEEE Transactions on Audio, Speech, and Language Processing* 21(6):1170–1179.
- Jeffrey Pennington, Richard Socher, and Christopher D Manning. 2014. Glove: Global vectors for word representation. In *EMNLP*. volume 14, pages 1532–1543.
- Jiahong Yuan and Mark Liberman. 2008. Speaker identification on the scotus corpus. *Journal of the Acoustical Society of America* 123(5):3878.
- Amir Zadeh, Paul Pu Liang, Navonil Mazumder, Soujanya Poria, Erik Cambria, and Louis-Philippe Morency. 2018. Memory fusion network for multi-view sequential learning. *arXiv preprint arXiv:1802.00927*.
- Qiang Zhu, Mei-Chen Yeh, Kwang-Ting Cheng, and Shai Avidan. 2006. Fast human detection using a cascade of histograms of oriented gradients. In *Computer Vision and Pattern Recognition, 2006 IEEE Computer Society Conference on*. IEEE, volume 2, pages 1491–1498.
